# Supplementary material
Source: publisher figshare collection journal article supplement (https://acs.figshare.com/ndownloader/files/3968065)
Supplement: Supplementary file 1 [file 3968065]

**Supporting Information for**  
**Evaluating the Environmental Impacts of Nano-Enhanced Field Emission Display Using**  
**Life Cycle Assessment**

**Venkata K.K. Upadhyayula<sup>a</sup>, David E. Meyer<sup>b\*</sup>, Mary Ann Curran<sup>b</sup> and Michael**  
**A.Gonzalez<sup>b</sup>**

a: Oak Ridge Institute of Science and Education (ORISE), MC-100-44, PO Box 117, Oak Ridge, TN 37831, USA.

b: United States Environmental Protection Agency, Systems Analysis Branch, NRMRL, 26 W. Martin Luther King Drive, Cincinnati, OH 45268.

To be submitted with the full length article

*Environmental Science and Technology*

April 11<sup>th</sup> 2013

\*Author for Correspondence

Present Address: United States Environmental Protection Agency (USEPA)

26 W. Martin Luther King Drive, Cincinnati, OH, 45268

Email: [Meyer.David@epa.gov](mailto:Meyer.David@epa.gov)

Phone: +1-513-569-7194

## S.1 Process Description of CNT-FED Manufacturing

The manufacturing of a CNT-FED consists of four modules: (1) fabrication of the CNT cathode substrate; (2) fabrication of the phosphor anode substrates; (3) vacuum sealing of the CNT cathode and phosphor anode substrates; and (4) the final assembly of the CNT-FED product. The fabrication of a cathode substrate begins with preparation of a conductive CNT paste, which constitutes the major raw material; the CNTs must be in a highly homogenous and in a uniformly dispersible state. To achieve this, the CNTs must be initially synthesized, purified and dried. The pure CNT powder is then mixed with organic solvents to produce a homogeneously dispersed CNT solution, which is ready for application into a conductive paste. The synthesis of CNTs was assumed to be carried out by chemical vapor deposition (CVD) using a  $C_2H_2$  feedstock as the carbon precursor and a bimetallic catalytic system (Ni (20 wt%) & Fe (20 wt%) on  $Al_2O_3$  support (60wt%)) as the substrate for facilitating CNT growth<sup>1</sup>. The synthesis step is followed by treatment of CNTs with a  $H_2SO_4:HNO_3$  acid mixture (3:1 (v/v)) in an ultrasonicator for 6 hours according to the procedure described by Wang et al.<sup>2</sup>. The acid-purified, dry CNT powder is dispersed in an organic solvent, such as isopropanol (IPA), or in plant-derived oil such as terpineol or rapeseed oil. The contents are ultrasonicated to generate a uniformly dispersed CNT solution<sup>3</sup>. If IPA is used as a solvent, the contents are then heated to maximize IPA solvent evaporation (95%) while ensuring the dispersivity of the CNTs in the remaining solvent is not lost. To this CNT solution, designated amounts of glass frit, metal powder, organic binder are added and the mixture is subjected to intense milling in a 3-roll ball mill for 1-2 hours<sup>4</sup>. The metal powder (or metal oxide) enhances the conductivity of the paste<sup>4c</sup>. The glass frit improves cohesion of the CNTs on the substrate after screen printing<sup>4c</sup>.

Further, a photosensitive vehicle is added to the above mixture and the milling is continued again for 2-3 hours <sup>4</sup>. However, the use of oils such as rapeseed or terpineol appears to be optional but highly desirable by some in the formulation of the CNT paste <sup>5</sup> but not by all <sup>4a</sup>. Addition of oils such as terpineol or rapeseed oil is to increase stability and dispersibility of CNTs in the solution of CNT paste.

The CNT paste is then screen printed onto an indium tin oxide (ITO) coated glass substrate and subsequently patterned into a predetermined shape using a UV hardening method <sup>4a, 4c</sup>. The patterned CNT-coated glass substrate is then baked at 400-500°C for one hour in a nitrogen rich atmosphere to remove the organic binder from the printed CNT paste <sup>6</sup>. However, the baking process may result in the loss of field emission activity of the CNTs as they tend to bury themselves beneath the organic contents of the paste <sup>4a</sup>. Therefore, the baked CNT-coated glass substrate must be treated with a liquid phase surface treating material comprising of a water soluble organic polymer binder (5-20 wt%) and a metal oxide (3-10 wt%) in water <sup>4a</sup>. This completes the fabrication of the CNT cathode substrate.

The preparation of the anode substrate in Module 2 is a well established process involving deposition of phosphors onto an ITO-coated glass substrate <sup>7</sup>. While many phosphor manufacturing techniques are documented in the open literature, in this study we assumed the use of zinc sulfide (ZnS) phosphors activated with Cu and Ag metals. These production details are provided by Poss <sup>7</sup>.

In Module 3, the CNT cathode and phosphor anode substrates are vacuum sealed according to the process given by a US Patent <sup>8</sup> used to seal flat panel displays. Finally, in Module 4, the vacuum sealed CNT-FED is assembled with electronic components such as cables

and printed wiring board (PWB). The entire set-up is encased in a housing to obtain a finished, ready-to-use CNT-FED product.

## S.2 Life Cycle Inventory (LCI) of the Metal Catalyst Production Process

A bimetallic system (Ni:Fe:Al<sub>2</sub>O<sub>3</sub>) catalyst is used in the catalytic chemical vapor deposition (CCVD) reactor to propagate CNT growth. The LCI data is based on the preparation of 1 kg of dry catalyst powder. While the reader can obtain a greater description of metal catalyst preparation from references <sup>1</sup>, the method is briefly discussed here. The salts, NiSO<sub>4</sub> and FeSO<sub>4</sub> along with Al<sub>2</sub>O<sub>3</sub> are mixed in DI water and the contents are stirred for one hour at 60°C. The impregnate is then oven dried at 100° C for 12 hrs followed by calcination in a muffle (retort) furnace at 400°C for 4 hrs. After calcination, the contents are ball milled for 60 hrs and reduced under an H<sub>2</sub> atmosphere at 450°C for 3 hrs. The dried metal catalyst powder is now ready to be used as a substrate to propagate CNT growth. A block diagram for production of metal catalyst powder as explained above is shown in Figure 1S.

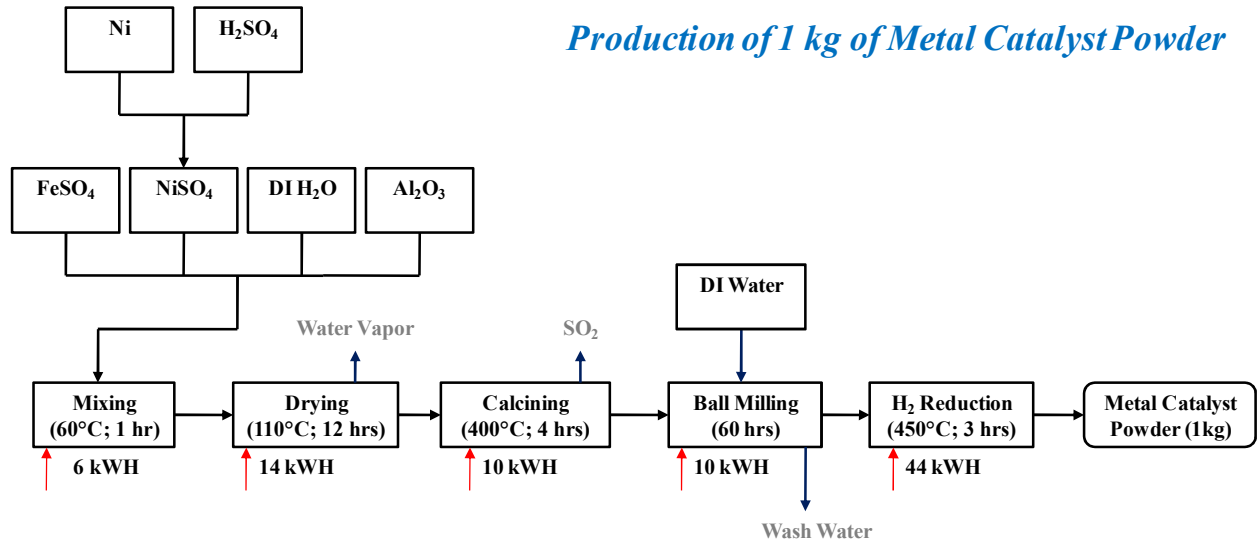

**Figure 1S.** Block Diagram for Metal Catalyst Powder Production

The LCI data for the production of 1 kg of metal catalyst powder is given in Table 1S.

**Table 1S.** LCI Data for Metal Catalyst Powder Production

| <i>Inputs</i>                                                 |                 |
|---------------------------------------------------------------|-----------------|
| <b>Materials/Energy</b>                                       | <b>Quantity</b> |
| Ni                                                            | 210 g           |
| Dilute H <sub>2</sub> SO <sub>4</sub>                         | 351 g           |
| Al <sub>2</sub> O <sub>3</sub>                                | 630 g           |
| FeSO <sub>4</sub>                                             | 571 g           |
| DI Water                                                      | 12 kg           |
| Total Energy                                                  | 84 kWh          |
| <i>Outputs (Emissions, Discharges &amp; Wastes Generated)</i> |                 |
| SO <sub>2</sub>                                               | 300 mg          |
| Water Vapor                                                   | 10 kg           |
| Wash Water                                                    | 2 kg            |

The above LCI data for the metal catalyst production is supported by the following calculations/assumptions:

- The modules for Ni, FeSO<sub>4</sub>, Al<sub>2</sub>O<sub>3</sub> and DI water are available in the Ecoinvent database <sup>9</sup>, whereas dilute H<sub>2</sub>SO<sub>4</sub> was provided by ERG <sup>10</sup>.
- The amount of metal catalyst to be produced is 1.05 kg (assuming 5% material lost during processing). The weights of individual components: Ni, Fe and Al<sub>2</sub>O<sub>3</sub> in the metal catalyst system was calculated according to the specified composition (20:20:60)% by weight.
- NiSO<sub>4</sub> is used as the precursor for Ni and is prepared by adding Ni pellets to dilute H<sub>2</sub>SO<sub>4</sub>. The corresponding stoichiometric equation for preparation of NiSO<sub>4</sub> is given as

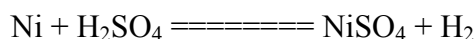

- FeSO<sub>4</sub> is used as the precursor for Fe and is calculated according to stoichiometric equation

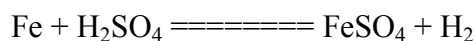

- e) DI water consumption was assumed to be 12 liters of which 10 liters are used for mixing  $\text{NiSO}_4$ ,  $\text{FeSO}_4$  and  $\text{Al}_2\text{O}_3$  and 2 liters for washing the ball mills after milling the metal catalyst powder.
- f) Energy estimation was performed using data from equipment specification sheets. This resulted in 6 kWh for mixing based on using a PM 40 mixer from Thermo Electron Corporation <sup>11</sup> plus 14 kWh for drying based on a lab gravity oven from Engineered Production Systems <sup>12</sup> plus 10 kWh for calcination based on a K114 model furnace from Kendro Laboratory Products <sup>13</sup> plus 10 kWh for milling of metal catalyst powder assuming the final catalyst median powder diameter is 80 nm <sup>10</sup> plus 44 kWh for the  $\text{H}_2$  reduction based on Model G 1200 CAMCo furnace <sup>14</sup>.
- g) Due to heating the sulfate bearing metal salts, there is a possibility that  $\text{SO}_2$  gas is emitted during the calcination process. While no direct information is available to confirm this, we calculated the amount of  $\text{SO}_2$  released for 1 kg of powder calcined based on  $\text{SO}_2$  release data provided by the cement industry ( $\sim 0.2\text{-}0.3$  kg  $\text{SO}_2$ /1 ton cement) (powder based industry) <sup>15</sup>.

### S.3 LCI of CNT Synthesis in CCVD Reactor

The dry, metal catalyst powder as prepared above is then loaded into a CCVD unit and heated to (800-900°C) for 30 minutes in  $\text{N}_2$  atmosphere to activate the catalytic sites. Heating is continued in the presence of an  $\text{H}_2$  and  $\text{N}_2$  gas mixture for one hour. Then,  $\text{C}_2\text{H}_2$  used as a carbon source, is introduced into the reactor, along with  $\text{H}_2$  and  $\text{N}_2$ , where the ratio of the three gases mixture is 20( $\text{C}_2\text{H}_2$ ):20( $\text{H}_2$ ):60( $\text{N}_2$ )% by volume, and with a reaction time of 30 min. Additional details of the CNT synthesis process can be obtained

from Liu et. al. <sup>1b</sup>. A block diagram for production of 1 kg of CNTs synthesized in a CCVD reactor system is shown in Figure 2S.

### *Production of 1 kg of Unpurified CNTs*

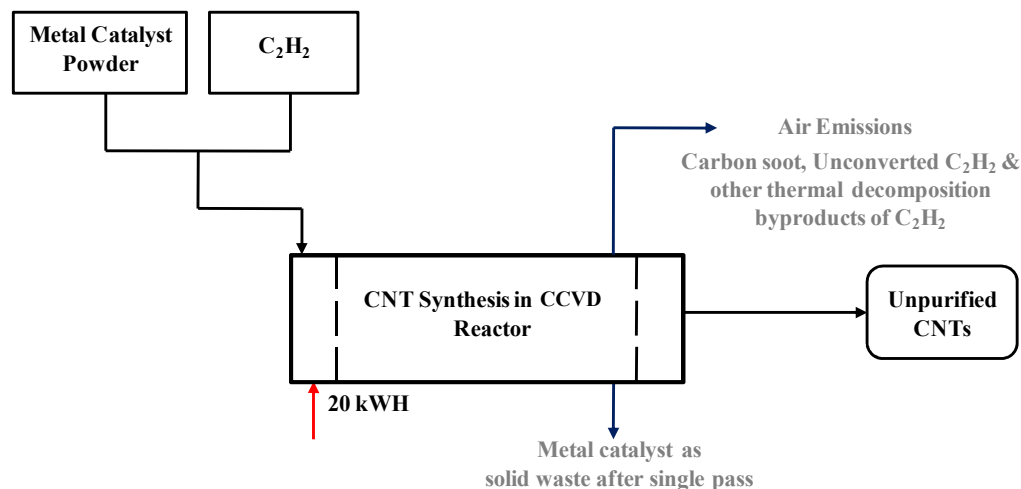

**Figure 2S.** Block Diagram for Production of Carbon Nanotubes Using CCVD Reactor

The LCI data for the production of 1 kg of unpurified CNTs is given in Table 2S.

**Table 2S.** LCI Data for Production of Unpurified CNTs

| Materials/Energy                                                     | Quantity  |
|----------------------------------------------------------------------|-----------|
| Metal Catalyst powder                                                | 3.6075 kg |
| C <sub>2</sub> H <sub>2</sub>                                        | 4.44 kg   |
| H <sub>2</sub>                                                       | 0.57 kg   |
| N <sub>2</sub>                                                       | 39.10 kg  |
| Total Energy                                                         | 20 kWh    |
| <b><i>Outputs (Emissions, Discharges &amp; Wastes Generated)</i></b> |           |
| Solid catalyst waste after single pass                               | 2.331 kg  |
| Unconverted C <sub>2</sub> H <sub>2</sub>                            | 25.2 g    |
| Particulate Matter (PM2.5)                                           | 48.56 g   |
| Cumulative Volatile Organic Chemicals (VOCs)                         | 48.70 mg  |
| Naphthalene                                                          | 43.21 µg  |
| Acenaphthylene                                                       | 1.36 µg   |
| Acenaphthene                                                         | 0.43 µg   |
| Phenanthrene                                                         | 0.86 µg   |
| Fluorene                                                             | 0.43 µg   |
| Anthracene                                                           | 0.13 µg   |

|               |                    |
|---------------|--------------------|
| Fluoroanthene | 0.21 $\mu\text{g}$ |
| Pyrene        | 0.27 $\mu\text{g}$ |

The above LCI data for CNT synthesis is supported by the following calculations/assumptions:

- a) LCI data for the metal catalyst powder was obtained from the data for stage 1 described previously. The LCI data for  $\text{C}_2\text{H}_2$ ,  $\text{H}_2$ , and  $\text{N}_2$  are available in the Ecoinvent database <sup>9</sup>. For air emissions,  $\text{C}_2\text{H}_2$ , VOCs and PAH entries are available in the “air emissions” category of the Ecoinvent database. However for VOCs, the value obtained is a cumulative value, whereas for individual chemicals (e.g. naphthalene, anthracene etc) they are entered for PAHs.
- b) We assumed the CNT synthesis is performed in a CCVD reactor provided by First Nano, a division of CVD Equipment Corporation, NY, USA. First Nano has a wide range of advanced turnkey type thermal catalytic CVD systems, which are built on a modular platform (i.e. it houses key process components in one unit), fully automated and is equipped with exhaust gas handling system as well. For the production units operating to synthesize CNTs for end product applications such as CNT-FEDs, it is customary to adapt these advanced CVD systems. So, our LCI data is based on the assumption the modular CVD and accompanying exhaust gas treatment system (scrubbing) provided by First Nano, and more specifically their Easy Tube <sup>TM</sup> 2000 CVD system <sup>16</sup>, is used for CNT synthesis.
- c) The quantity of energy consumed for CNT synthesis is based on an equipment rating provided for the Easy Tube<sup>TM</sup> 2000 CVD system <sup>16</sup> which closely matches with the data

given by Kushnir et al.<sup>17</sup> for 1 kg of CNTs synthesized in a fluidized bed CVD (only process heating considered).

- d) Carbon deposition yield (CDY) and synthesis reaction yield (SRY) are assumed to be 30% for each<sup>1a, 5a</sup>. The CDY is the ratio of ((mass of carbon deposited)/(mass of catalyst fed in dry form)\*100), whereas the SRY is ratio of ((mass of carbon deposited)/(mass of carbon fed into the system)\*100). Thus the amount of metal catalyst powder needed to synthesize 1 kg of CNTs is 3.33 kg, (1 kg/ 0.3), whereas the C<sub>2</sub>H<sub>2</sub> needed is 3.6075 kg ((1/0.3)\*(26/24)) respectively.
- e) The quantities of the H<sub>2</sub> and N<sub>2</sub> inputs are calculated based on the processing conditions described by Liu et al.<sup>1b</sup>. The paper describes 100% N<sub>2</sub> being introduced into the system followed by a 20:80% by volume ratio of H<sub>2</sub>:N<sub>2</sub> for one hour. This is followed by the introduction of a three-gas mixture (H<sub>2</sub>:C<sub>2</sub>H<sub>2</sub>:N<sub>2</sub>) being fed into the system in a ratio of 20:20:60% by volume. The ratio of volume percentage for the three gases is then converted to a mass basis, resulting in a mass percentage ratio of H<sub>2</sub>(2%):C<sub>2</sub>H<sub>2</sub>(25%):N<sub>2</sub>(73%). Thus during synthesis, the amount of C<sub>2</sub>H<sub>2</sub> fed into the system is 3.6075 kg (based on the SRY as calculated above). Additionally, the amounts of H<sub>2</sub> and N<sub>2</sub> fed into the system are 0.2886 and 10.53 kg, respectively. During catalyst preheating, the amount of N<sub>2</sub> used is 14.43 kg, whereas during H<sub>2</sub> reduction, the amounts of H<sub>2</sub> and N<sub>2</sub> fed are 0.29 and 14.14 kg, respectively. Thus, the total amount of H<sub>2</sub>, C<sub>2</sub>H<sub>2</sub> and N<sub>2</sub> gases consumed during the entire process (i.e. inclusive preheating, H<sub>2</sub> reduction and synthesis steps) are 0.5786, 3.6075, and 39.1 kg, respectively.
- f) The catalyst was assumed to be used only for one pass and after the CNT synthesis is completed; the left over catalyst powder is disposed of as a solid hazardous waste.

- g) The unreacted  $C_2H_2$ , along with its thermal decomposition products such as benzene, toluene, and but-1-en-3-yne, etc.<sup>18</sup> vented from CCVD are sent to an exhaust gas system for the Easy Tube™ 2000, where scrubbing is performed to retain these toxic gases. The release of toxic byproducts such as VOCs and PAHs is a serious issue when using hydrocarbon feedstocks for CNT synthesis<sup>19</sup>. By employing an advanced CVD systems equipped with built-in scrubber systems, the release of toxic exhaust gases into the atmosphere can be contained effectively. For  $C_2H_2$ , 70% of the gas appears in the effluent (since SRY is 30%) and leaves the reactor unreacted. This value is in close agreement with the effluent  $C_2H_2$  concentration reported by Schmitt et al.<sup>18</sup> after a synthesis time of 30 min. Thus, 70% of 3.6075 kg = 2.5252 kg of  $C_2H_2$  will leave the reactor and be sent to the exhaust system, where exhaust gas treatment efficiency was assumed to be 99%. Thus, the amount of unconverted  $C_2H_2$  vented to the atmosphere is 25.25 grams.
- h) The amount of  $H_2$  and  $N_2$  released into the atmosphere was assumed to be negligible.
- i) The amount of particulate matter (carbon soot) released was assumed to be 48.56 grams per kg of CNTs synthesized. This value is based on a personal communication with a carbon nanoparticle manufacturing company (confidential).
- j) VOC and PAH Emission Assumptions: Plata et al.<sup>19</sup> reported that different types of VOCs and PAHs are released in the effluent when  $C_2H_4$  is used as a carbon precursor to synthesize CNTs. Further, Plata mentions the VOC and PAH emissions are an order of magnitude less for  $C_2H_2$  used as a carbon feedstock than for those released when  $C_2H_4$  is used as a feedstock<sup>20</sup>. Our emission values for VOCs and various PAHs are based on data reported by Plata et al.<sup>19</sup> for  $C_2H_4$  feedstock. but the final emissions for VOCs and PAHs (Table S2) are ten times less than the reported data for  $C_2H_4$  feedstock,

k) VOC Calculation Based on Plata's Data: According to Plata et al.<sup>19</sup>, the concentration of VOCs for 70 SCCM (standard cubic centimeters per minute) of entering C<sub>2</sub>H<sub>4</sub> gas (at 1040°C) ranges from 17.6 ppmv (1,3-cyclopentadiene) to 17,000 ppmv (methane). Thus, for 70 SCCM of C<sub>2</sub>H<sub>4</sub>, a cumulative value of 20,000 ppmv was assumed.

The value from ppmv to mg/m<sup>3</sup> can be converted according to following formula:

$$\text{mg/m}^3 = (\text{ppmv}) * (12.187) * (\text{MW}) / (273 + T) \quad (1)$$

Where ppmv = concentration of gas component; 12.187 = conversion factor; MW = molecular weight of the component; and T = temperature in °C<sup>21</sup>.

Based on the above formula, the cumulative VOC value of 20,000 ppmv is equivalent to 2,970 mg/m<sup>3</sup>; since methane is a major VOC constituent (17,000 ppmv), the molecular weight of methane is used in Equation 1. On the other hand, 70 SCCM = 0.07 SLPM (standard liters per minute) of C<sub>2</sub>H<sub>4</sub> and 330 SCCM = 0.33 SLPM of H<sub>2</sub> is fed into the reactor for 30 minutes. Thus for 30 minutes, the total volume of the gas mixture feed is 12 liters (0.012 m<sup>3</sup>). Therefore, the mass of cumulative VOCs released will be (2970 mg/m<sup>3</sup>)\*(0.012) = 35.64 mg. Now, 70 SCCM of C<sub>2</sub>H<sub>4</sub> = 0.088 g/min; thus for 30 minutes, the amount of hydrocarbon (C<sub>2</sub>H<sub>4</sub>) fed into system is 2.64 g. Therefore, for 2.64 g of C<sub>2</sub>H<sub>4</sub>, the cumulative VOC release will be 35.64 mg. But as assumed earlier, when C<sub>2</sub>H<sub>2</sub> is used as a feedstock instead of C<sub>2</sub>H<sub>4</sub>, the amount of VOC release would be ten times less which means for 2.64 g of C<sub>2</sub>H<sub>2</sub>, the cumulative VOC release will be 3.564 mg. Further, when exhaust controls are applied with 99% efficiency, the amount of VOCs vented to the atmosphere is 0.03567 mg = 35.64 µg. Assuming a linear relationship between C<sub>2</sub>H<sub>2</sub> use and VOC release, 3.6075 kg of C<sub>2</sub>H<sub>2</sub> usage will result in 48.70 mg of VOCs released.

- l) PAH Calculations Based on Plata's Data: Plata et al.<sup>19</sup> reported the amounts of various PAHs released per gram of  $C_2H_4$  used as carbon feedstock, by assuming these amounts to be 10 times less when  $C_2H_2$  is used. Further, when exhaust gas treatment controls are applied, the PAH emission quantities must be further reduced by 99%. Thus, the final emissions of various PAHs to the atmosphere when 3.6075 kg of  $C_2H_2$  is used as feedstock are: 43.21  $\mu\text{g}$  of naphthalene; 1.36  $\mu\text{g}$  of acenaphthylene; 0.43  $\mu\text{g}$  of acenaphthene; 0.86  $\mu\text{g}$  of fluorene; 0.43  $\mu\text{g}$  of phenanthrene; 0.13  $\mu\text{g}$  of anthracene; 0.21  $\mu\text{g}$  of fluoroanthrene; and 0.27  $\mu\text{g}$  of pyrene respectively.

#### S.4 LCI of CNT Acid Purification Step

The as-synthesized CNTs obtained above are then purified in an ultrasonicator by washing in a mixture of concentrated  $HNO_3$  and  $H_2SO_4$  in a ratio of 3:1 by volume<sup>2</sup>. The ultrasonication step is succeeded by centrifugation/decantation, followed by oven drying of the cake to obtain the acid purified CNTs in a dry form. A diagram for the CNT acid purification step is shown in Figure 3S.

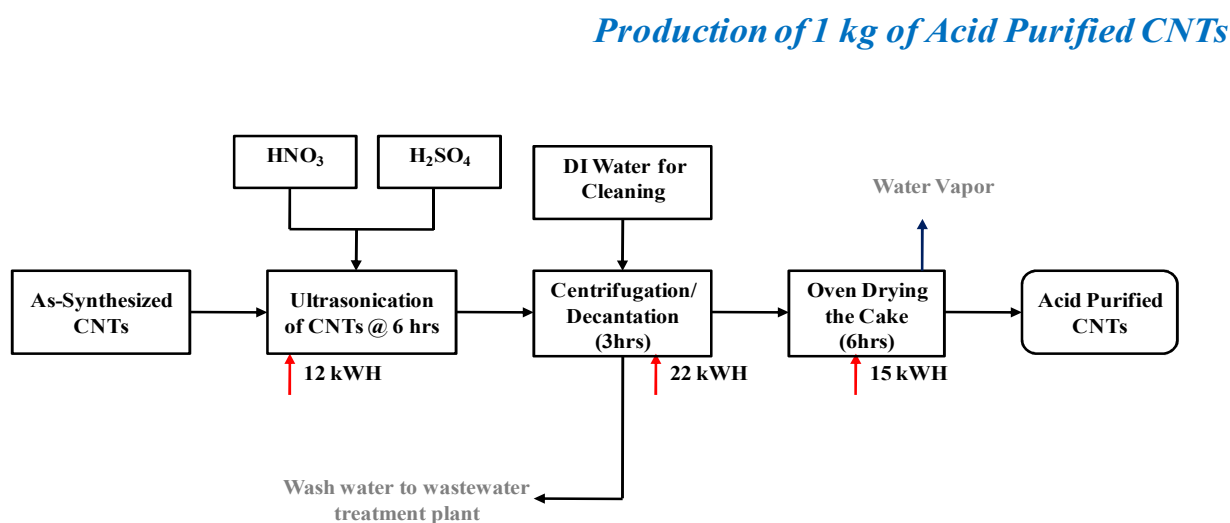

**Figure 3S.** Block Diagram for Acid Purification of Carbon Nanotubes

The LCI data for the CNT acid purification step is given in Table 3S.

**Table 3S.** LCI Data for CNT Purification

| <b>Materials/Energy</b>                                              | <b>Quantity</b> |
|----------------------------------------------------------------------|-----------------|
| As synthesized CNTs                                                  | 1.11 kg         |
| Concentrated HNO <sub>3</sub> (68%)                                  | 38.621 kg       |
| Concentrated H <sub>2</sub> SO <sub>4</sub> (98%)                    | 153.18 kg       |
| DI Water                                                             | 544 kg          |
| Total Energy                                                         | 49 kWh          |
| <b><i>Outputs (Emissions, Discharges &amp; Wastes Generated)</i></b> |                 |
| Water vapor emission to air                                          | 10 kg           |
| Wash water effluent to wastewater treatment plant                    | 736 kg          |

The above LCI data for the CNT acid purification step is supported by following calculations/assumptions:

- The LCI data for acid purified CNTs is obtained from stage 2, whereas the LCI data for concentrated HNO<sub>3</sub> and H<sub>2</sub>SO<sub>4</sub> plus DI water are available in Ecoinvent <sup>9</sup>.
- Consumption of acids was calculated based on the assumption that 37.5 mL of H<sub>2</sub>SO<sub>4</sub> and 12.5 mL of HNO<sub>3</sub> (total 50 mL) are mixed and used to wash 500 mg of CNTs <sup>2</sup>. Assuming a 90% purification yield, the acid consumption was calculated to be 111 liters, where the quantity of H<sub>2</sub>SO<sub>4</sub> is 83.25 liters and HNO<sub>3</sub> is 27.75 liters, respectively
- The energy consumption for the ultrasonication step was calculated based on an ultrasonic processor UIP 2000 hd with a 2000 W rating and an upper range processing liquid capacity of 0.5 m<sup>3</sup> supplied by Hielscher Ultrasonics GMBH <sup>22</sup>. The energy consumption of centrifugation/decantation was based upon the equipment specification sheet supplied by Rousselet Inc, from France <sup>23</sup>. Energy consumed in the oven drying step was based on the power ratings provided on the data sheet provided by Cole Parmer for one gravity convection oven dryer unit.

- d) The decanted acid is removed from the centrifuge and collected in a waste container. Subsequently, the cake (wet CNT powder) was assumed to be rinsed twice with DI water, where the amount of DI water used for each wash is double (222 liters) the amount of acid used. Finally, after transferring the cake to the oven dryer unit, the centrifuge was assumed to be rinsed with 100 liters of DI water. Thus, the amount of DI water consumed, for this step, is 544 liters per batch.
- e) The decanted acid solution and wash water are collected in a waste container and is sent to a wastewater treatment plant without further pretreatment.
- f) The residual water associated with the CNT cake is removed as water vapor ( $\sim 10$  kg) in the oven drying step.

#### S.5 LCI of Conductive CNT Paste Preparation

A simplified process description for the CNT paste was previously provided in S.1. A block diagram for preparation of CNT paste is shown in Figure 4S.

##### *Preparation of 100 g CNT Paste for Fabrication of One CNT Cathode Substrate*

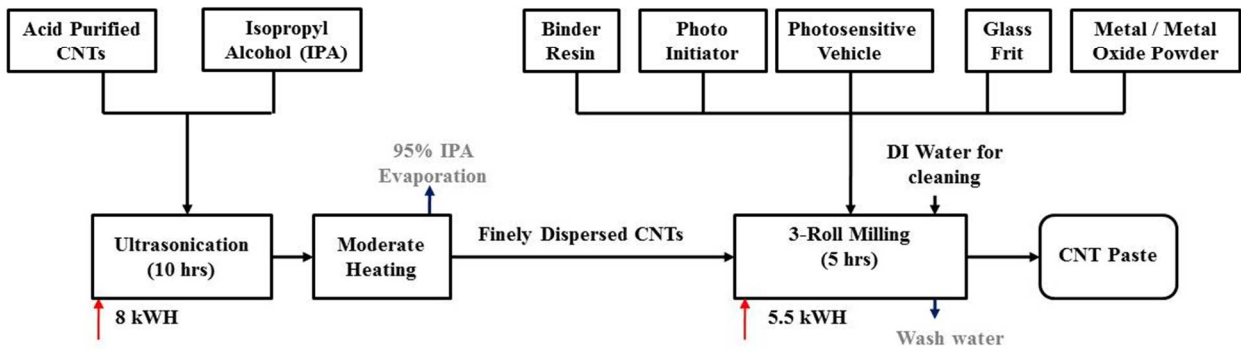

**Figure 4S.** Block Diagram for Preparation of Carbon Nanotube Conductive Paste (for Baseline Case (Scenario 0))

The LCI data for CNT paste preparation step is given in Table 4S.

**Table 4S.** LCI Data for Carbon Nanotube Conductive Paste Preparation

| Materials/Energy                                              | <i>Inputs</i>                   |                                 |                                          |                                         |                                                  |
|---------------------------------------------------------------|---------------------------------|---------------------------------|------------------------------------------|-----------------------------------------|--------------------------------------------------|
|                                                               | Quantity                        |                                 |                                          |                                         |                                                  |
|                                                               | Scenario 0<br>(IPA & Ag Powder) | Scenario 1<br>(IPA & Zn Powder) | Scenario 2<br>(Rapeseed Oil & Ag Powder) | Scenario 3<br>(IPA & TiO <sub>2</sub> ) | Scenario 4<br>(Rapeseed Oil & TiO <sub>2</sub> ) |
| Acid Purified CNTs                                            | 30 g                            | 30 g                            | 15 g                                     | 15 g                                    | 5 g                                              |
| Isopropyl Alcohol (IPA) for CNT Dispersion                    | 7.074 kg<br>(9 Liters)          | 7.074 kg<br>(9Liters)           | Not Used                                 | 3.537 kg<br>(4.5 Liters)                | Not Used                                         |
| Rapeseed Oil for CNT Dispersion                               | Not Used                        | Not Used                        | 150 g                                    | Not Used                                | 50 g                                             |
| Organic Binder (Epoxy Resin)                                  | 39 g                            | 39 g                            | 44 g                                     | 39 g                                    | 49 g                                             |
| Photosensitive Vehicle<br>(Methyl Acrylate)                   | 20 g                            | 20 g                            | 35 g                                     | 25 g                                    | 30 g                                             |
| Photo Initiator (Anthraquinone)                               | 1 g                             | 1 g                             | 1 g                                      | 1 g                                     | 1 g                                              |
| Glass Frit                                                    | 5 g                             | 5 g                             | Not Used                                 | 5 g                                     | Not Used                                         |
| Metal Powder                                                  | Ag powder<br>5 g                | Zn Powder<br>5 g                | Ag Powder<br>5 g                         | Not Used                                | Not Used                                         |
| Metal Oxide Powder                                            | Not Used                        | Not Used                        | Not Used                                 | TiO <sub>2</sub><br>15 g                | TiO <sub>2</sub><br>15 g                         |
| DI Water                                                      | 5 kg                            | 5 kg                            | 5 kg                                     | 5 kg                                    | 5 kg                                             |
| Total Energy                                                  | 14.5 kWh                        | 14.5 kWh                        | 14.5 kWh                                 | 14.5 kWh                                | 14.5 kWh                                         |
| <i>Outputs (Emissions, Discharges &amp; Wastes Generated)</i> |                                 |                                 |                                          |                                         |                                                  |
| IPA Solvent Emission to Air                                   | 36 g                            | 36 g                            | None                                     | 18 g                                    | None                                             |
| Wash water effluent to<br>wastewater treatment plant          | 5 kg                            | 5 kg                            | 5 kg                                     | 5 kg                                    | 5 kg                                             |

The above LCI data for the CNT paste formation step is supported by the following calculations/assumptions:

- The LCI data module for acid-purified CNTs was obtained as described above in S4, whereas all other LCI data modules are available in the US Life Cycle Inventory Database (USLCI) <sup>24</sup> or the Ecoinvent <sup>9</sup> database, with preference given to the former; where data were not available, the latter was used.
- Dispersion of acid purified CNTs in IPA is performed according to a procedure described by Mao et al. (US Patent 7,040,948 B2)<sup>25</sup> According to this procedure, 1g of acid-purified CNTs requires 300 mL IPA.
- The total weight of CNT paste composition is fixed as 100 g for baseline as well as other alternate scenarios considered.

- d) The CNT paste composition for scenario 0 was based on a US Patent (7,648,424 B2) <sup>4a</sup>. According to Jin et al. <sup>4a</sup>, the CNT paste composition (used for baseline scenario in our study) is comprised of 1-30% wt of finely dispersed CNTs; 30-60% mixture of organic binder and an organic vehicle; 0.1-20% of frit; and 0.1 -20% metal powder (e.g. Ag, Al, Zn, Cu or Ni). Specifically, the CNT composition used was: 30% finely dispersed CNTs; 40% organic binder (epoxy resin) and 20% photosensitive organic vehicle (methyl methacrylate monomer); 5% frit and 5% Ag metal powder. The CNT paste composition used in scenario 1 (for contribution analysis) is same as scenario 0 except that Zn powder is used in place of Ag powder.
- e) The energy consumption for ultrasonication was calculated to be 8 kW based on the assumption that 80W of a 59 kHz lab model ultrasonicator is used for the dispersion <sup>2</sup>. For heating the solution on a laboratory-sized heater, approximately 1 kW of energy is used whereas the energy consumption for a 3-roll milling operation was estimated to be 5.5 kW based on an equipment data specification sheet provided by EXAKT <sup>26</sup>. Energy consumption for ultrasonication and 3-roll mill was obtained from equipment data specification sheets.
- f) After milling, 5 liters (5 kg) of DI water are used for cleaning the mills and correspondingly 5 kg of rinse water are released. This water was assumed to be sent to a wastewater treatment plant for treatment
- g) It was assumed that 95% of the IPA solvent evaporates during the heating step. Additionally, it was assumed proper controls are applied to capture the evaporated IPA solvent with an efficiency of 99%.

- h) LCI data for CNT paste composition in scenarios 2 and 4 is obtained from US Patent (2008/0004380 A1).<sup>5b</sup> According to this patent the CNT paste composition can contain anywhere from 0.01-15wt% CNTs; 1-70% binder resin; 1-70% photosensitive vehicle; 5-60% metal oxide powder (e.g. SiO<sub>2</sub>, TiO<sub>2</sub>, ZrO, SnO); and remaining percentage of a solvent (e.g., rapeseed oil or terpineol) maintain CNT dispersion).
- i) IPA solvent is replaced with Rapeseed oil in scenario 2 and is used for dispersing CNTs. It can be noted that the viscosity of rapeseed oil is 160 cP as against IPA solvent (2.86 cP). Therefore, the former is used in less proportion in CNT paste composition.
- j) In scenario 3, the CNT paste composition is exactly identical to scenario 0 except that Ag powder is replaced with TiO<sub>2</sub>. The CNT paste composition for scenario 3 is obtained from US Patent (7,648, 424, B2)<sup>5b</sup>
- k) In scenario 4, IPA solvent is replaced by Rapeseed oil and Ag powder is replaced by TiO<sub>2</sub>.

## **S.6 LCI of Conductive CNT Cathode Substrate Fabrication**

A simplified process description of screen printing of CNT paste onto a glass substrate is given in S.1. A block diagram for preparation of the CNT cathode substrate is shown in Figure 5S.

### *Production of One CNT Cathode Substrate*

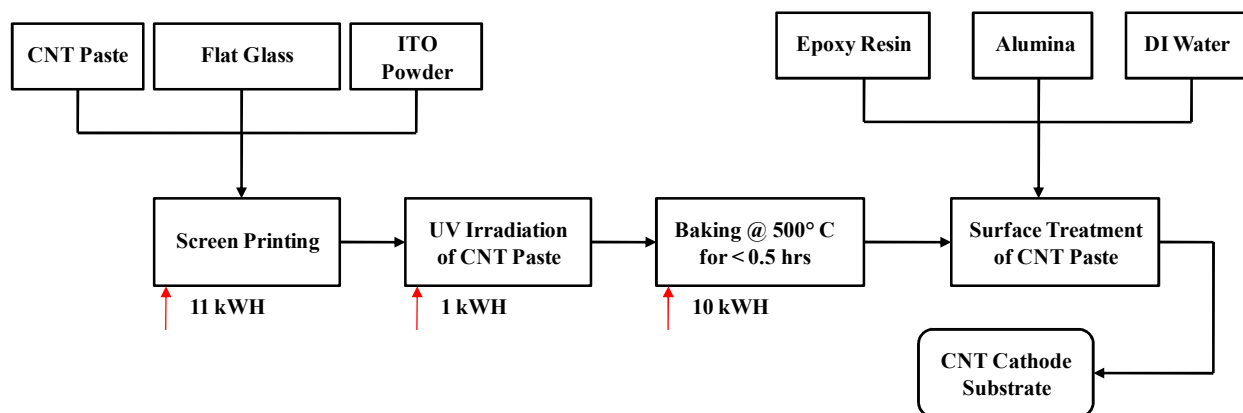

**Figure 5S.** Block Diagram for Fabrication of a CNT Cathode Substrate

The LCI data for the CNT cathode substrate production step is given in Table 5S.

**Table 5S.** LCI Data for CNT Cathode Substrate Production

| <i>Inputs</i>                           |          |
|-----------------------------------------|----------|
| Materials/Energy                        | Quantity |
| As synthesized CNTs (Baseline Scenario) | 100 g    |
| Flat glass Cr coated                    | 608.59 g |
| ITO Powder                              | 0.5 g    |
| Epoxy Resin                             | 200 g    |
| DI Water                                | 700 g    |
| Alumina                                 | 100 g    |
| Total Energy                            | 3.6 kWh  |

The above LCI data for the CNT cathode substrate fabrication step is supported by the following calculations/assumptions:

- a) The LCI data module for the CNT paste (100g) was obtained from stage 4 above (baseline scenario). The LCI data for Cr-coated flat glass, ITO powder, epoxy resin, and DI water are available in Ecoinvent <sup>9</sup>, whereas alumina data are available in the USLCI database <sup>24</sup>.

- b) Energy consumption for the screen printing was based on specification data obtained from the LS-34 TV screen printer model from the Marubeni American Corporation <sup>27</sup>; for the UV irradiation step, energy was based on a lamp power density of 20 mW/cm<sup>2</sup> <sup>28</sup>; and for the baking step from equipment data specification sheets <sup>12</sup>.
- c) The amount calculated was based on assuming the glass has a density of 2.63 g/cm<sup>3</sup> <sup>29</sup> and a thickness of 2.8 mm. , it was assumed the viewing area for a CNT-FED is similar to that of a LCD display, as considered in a USEPA study <sup>30</sup> (122 inch<sup>2</sup> = 787.095 cm<sup>2</sup>). Thus, the volume of the glass is (787.09 cm<sup>2</sup>)\*(0.28 cm) 220.38 cm<sup>3</sup>. Based on the density of glass, the mass of glass used was assumed to be 2.63 (g/cm<sup>3</sup>)\*(220.38 cm<sup>3</sup>) = 579.61 g. Assuming 5% more glass is needed to account for processing losses, the total mass of glass used was 608.59 g
- d) The quantity of glass was assumed to be same as 15-inch LCD panel <sup>30</sup>. Further, 5% more glass was assumed in order to compensate while processing the glass substrate.
- e) The module for sputtering ITO onto the glass substrate is available in Ecoinvent <sup>9</sup>.

The materials used in the surface treatment of baked, CNT cathode substrates were based on the description provided by Jin et al. <sup>4a</sup>

## **S.7 LCI of Phosphor Anode Substrate Fabrication**

A block diagram for the preparation of a phosphor anode substrate is shown in Figure 6S.

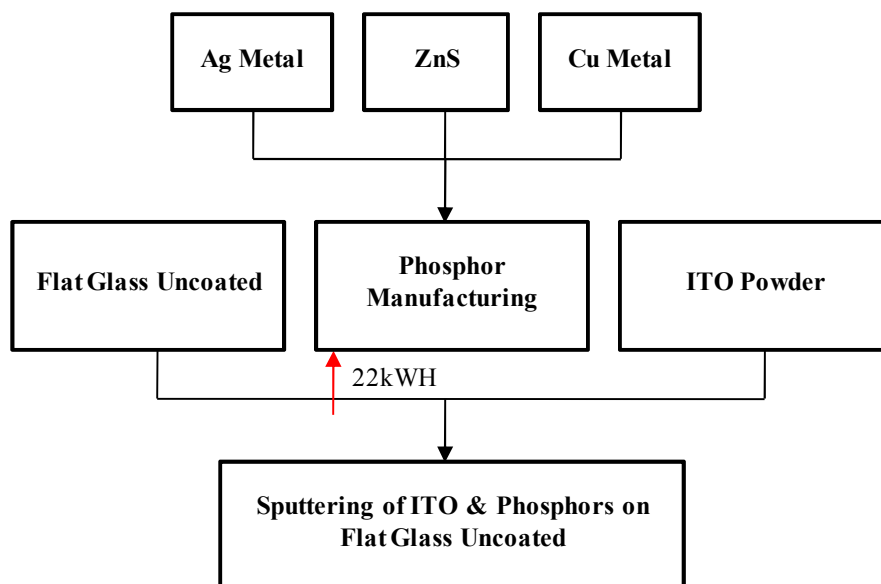

**Figure 6S.** Block Diagram for Fabrication of a Phosphor Anode Substrate

The LCI data for phosphor anode substrate fabrication step is given in Table 6S.

**Table 6S.** LCI Data for Phosphor Anode Substrate Fabrication

| <i>Inputs</i>                                                                     |                 |
|-----------------------------------------------------------------------------------|-----------------|
| <b>Materials/Energy</b>                                                           | <b>Quantity</b> |
| ZnS                                                                               | 18.8 g          |
| Cu                                                                                | 6.3 mg          |
| Concentrated H <sub>2</sub> SO <sub>4</sub> (for formation of CuSO <sub>4</sub> ) | 20.38 mg        |
| Ag                                                                                | 22.86 mg        |
| Concentrated HNO <sub>3</sub> ( for formation of AgNO <sub>3</sub> )              | 13.35 mg        |
| NaCl                                                                              | 1.11 g          |
| Flat glass uncoated                                                               | 608.5 g         |
| ITO Powder                                                                        | 0.5 g           |
| Total Energy                                                                      | 7.5 kWh         |

The above LCI data for the CNT cathode substrate fabrication step is supported by the following calculations/assumptions:

- The materials and energy used in zinc sulfide phosphor manufacturing are based on US patent literature (USP 3,657, 142) <sup>7</sup>. The patent states ZnS:NaCl:CuSO<sub>4</sub>:AgNO<sub>3</sub> are in the quantity of 2724:56:0.083:1.56 (PBW) parts by weight, respectively. Furthermore, the total amount of phosphor needed was assumed to be similar to the quantity needed for a

15-inch CRT desktop display which is 20 grams. Thus, the amounts of individual chemicals in 20 grams are 18.8 g of ZnS, 1.11 g of NaCl, 16.6 mg of CuSO<sub>4</sub> and 36 mg AgNO<sub>3</sub>. However, since the modules for CuSO<sub>4</sub> and AgNO<sub>3</sub> are not available in the Ecoinvent database, the amounts of Cu and concentrated H<sub>2</sub>SO<sub>4</sub> needed to form CuSO<sub>4</sub> and the amounts of Ag and concentrated HNO<sub>3</sub> needed to form AgNO<sub>3</sub> were estimated based on respective stoichiometric equations.

- b) The amount of glass substrate was assumed to be similar to the amount of glass used in the CNT cathode substrate preparation.
- c) The amount of ITO powder coated on the glass substrate was based on the quantity used for LCD panels <sup>30</sup>.
- d) Energy consumption for phosphor manufacturing was based on the description given in a US Patent (3,657,142) <sup>7</sup>. Additionally, the phosphors are heated in a muffle (retort) furnace for 3 hours at 900-1300°C.

## S.8 LCI Data for Vacuum Sealing CNT Cathode and Phosphor Anode Substrates

A block diagram for the vacuum sealing step is shown in Figure 7S.

### *Vacuum Sealing of One CNT-FED Substrate*

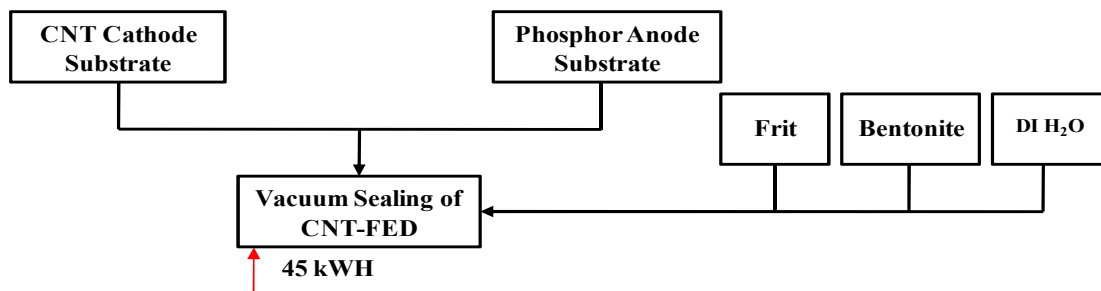

**Figure 7S.** Block Diagram for Vacuum Sealing Operation of CNT-FED

The LCI data for Phosphor anode fabrication step is given in Table 7S.

**Table 7S.** LCI Data for Phosphor Anode Fabrication

| <i>Inputs</i>            |                 |
|--------------------------|-----------------|
| <b>Materials/Energy</b>  | <b>Quantity</b> |
| CNT Cathode Substrate    | 709 g           |
| Phosphor Anode Substrate | 629 g           |
| Frit                     | 98 g            |
| Bentonite                | 2 g             |
| DI Water                 | 150 g           |
| Total Energy             | 45 kWh          |

The above LCI data for the vacuum sealing of CNT-FED is supported by the following calculations/assumptions.

- a) The LCI data modules for the CNT cathode substrate and phosphor anode were obtained from stages 5 & 6 respectively. The chemicals, including energy consumption, for the vacuum sealing were obtained from a US patent (6,554,672 B2) data <sup>8</sup>

## S.9 LCI Data for Complete Assembly of CNT-FED Device

A block diagram for complete assembly of a CNT-FED device is shown in Figure 8S.

### *Complete Assembly of One CNT-FED Device*

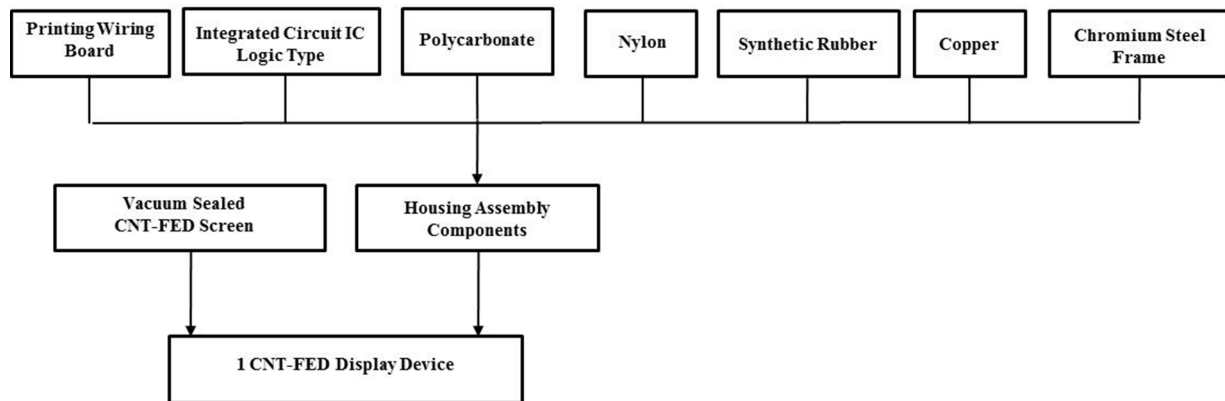

**Figure 8S.** Block Diagram for Complete Assembly of one CNT-FED Product

The LCI data for the complete assembly of CNT-FED device is given in Table 8S.

**Table 8S.** LCI for CNT-FED Device Assembly

| <i>Inputs</i>                    |                 |
|----------------------------------|-----------------|
| <b>Materials/Energy</b>          | <b>Quantity</b> |
| Vacuum sealed CNT-FED            | 1438 g          |
| Chromium Steel                   | 177.20 g        |
| Copper at regional storage       | 4.8422 g        |
| Printed wiring board             | 68.415 g        |
| Integrated Circuit IC Logic Type | 12.80 g         |
| Polycarbonate                    | 500 g           |
| Nylon 6                          | 9.8406 g        |
| Synthetic Rubber                 | 6.3261 g        |

The above LCI data for the complete assembly of a CNT-FED device is supported by the following calculations/assumptions:

- a) The LCI data for the vacuum sealed CNT-FED is obtained from S.8.
- b) The amounts of cable, steel, printed circuit board, and polymer materials were assumed to be same as that for an LCD desktop panel <sup>30</sup>.

#### **S.10 Contribution of Environmental Impacts of CNT Paste Formulation toward Fabrication of CNT Cathode Substrate**

In Figure 9S, the cradle-to-gate impact assessment results for CNT cathode substrate fabrication (Module 1) are set at 100%, as represented by the black bars. Module 1 includes CNT paste formulation as well as screen printing, UV irradiation, and baking and surface treatment of the CNT cathode substrate. The white bars represent the normalized cradle-to-gate impact assessment results for CNT paste formulation only (a step within Module 1). CNT paste formulation is responsible for 95-98% of the overall total impact resulting from the CNT cathode substrate fabrication step. The remaining steps combined contribute 2-5% of the impacts.

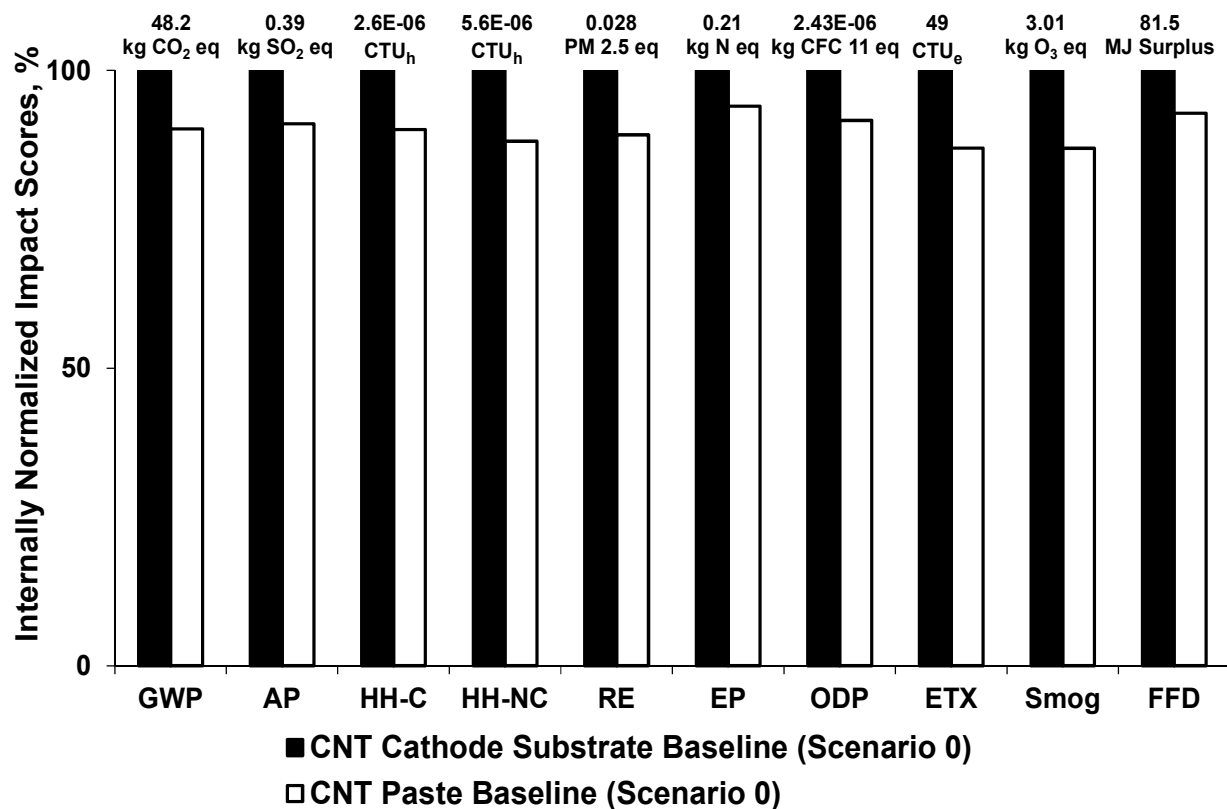

**Figure 9S.** Contribution of CNT Paste Preparation (Baseline Scenario) Impacts toward CNT Cathode Fabrication Step

### S.11 Cradle-to-Gate Life Cycle Impact Assessment Results for four different CNT Paste Formulation Scenarios

The cradle-to-gate life cycle impact assessment results for the four different CNT paste preparation methods (one baseline scenario and three alternate scenarios used for sensitivity analysis) are given in Figure 10S.

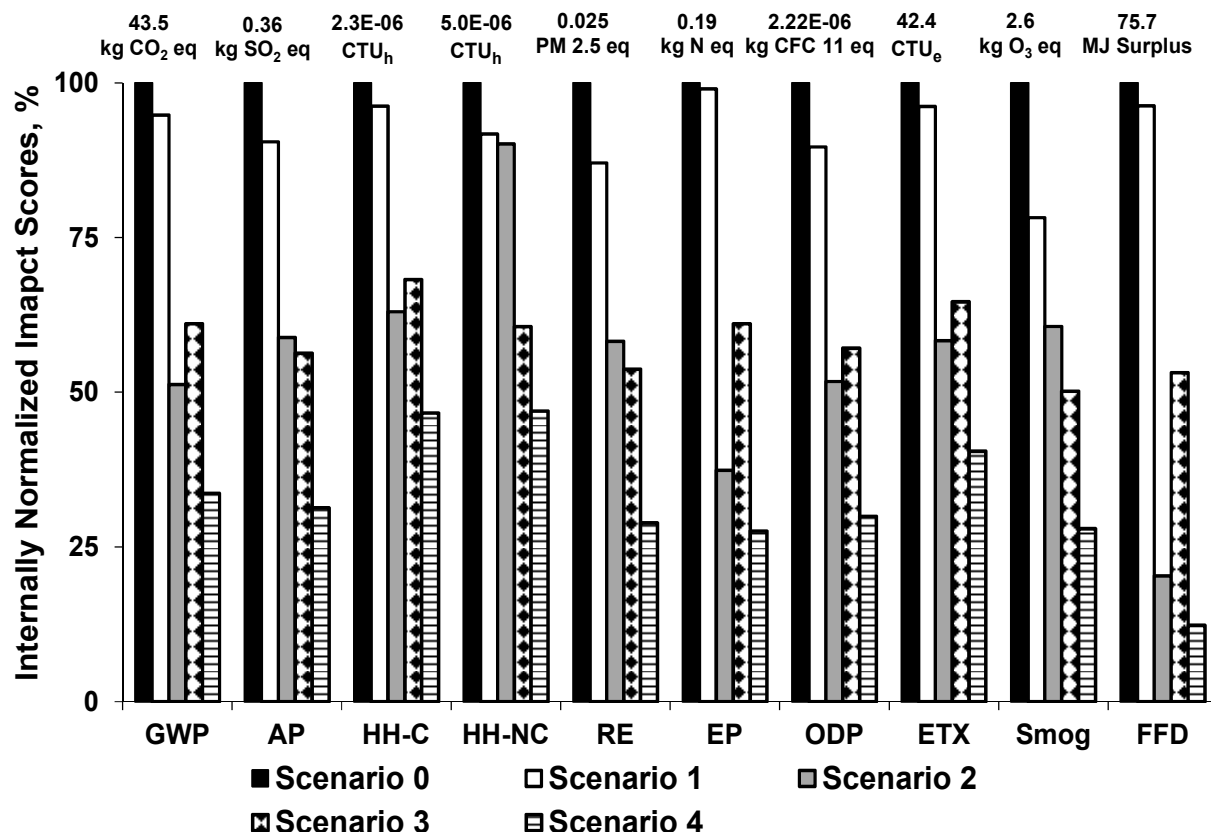

**Figure 10S.** Comparison of Impact Assessment Results for Four Different CNT Paste Formulation Scenarios

## REFERENCES

- (a) Fazle Kibria, A. K. M.; Mo, Y. H.; Nahm, K. S., Synthesis of carbon nanotubes over nickel-iron catalysts supported on alumina under controlled conditions *Catalysis Letters* **2001**, 71 (3-4), 229-236; (b) Liu, J.; Harris, A. T., Synthesis of multiwalled carbon nanotubes on  $\text{Al}_2\text{O}_3$  supported Ni catalysts in a fluidized bed. *AIChE* **2010**, 56 (1), 102-113.
- Wang, Y.; Wu, J.; Wei, F., A treatment method to give separated multi walled carbon nanotubes with high purity, high crystallization and a large aspect ratio. *Carbon* **2003**, 41, 2939-2948.
- (a) CTI Nanotubes CNTs 101 presentation. <http://www.cheaptubes.com/carbon-nanotubes-101.htm> (accessed Feb 2); (b) Park, J. H.; Alegaonkar, P. S.; Jeon, S. Y.; Yoo, J. B., Carbon nanotube composite: Dispersion routes and field emission parameters. *Composites Science and Technology* **2008**, 68, 753-759.
- (a) Jin, Y. W.; Lee, H. J.; Moon, J. W.; Chung, D. S.; Choi, J. H.; Cho, S. H. Forming carbon nanotube emitter. US 7,648,424 B2, March 16, 2010; (b) Kim, D. J.; Song, Y. H.; Jeong, J. W. Methods of manufacturing carbon nanotube (CNT) paste emitter with high reliability. 2008; (c) Shi, Y. S.; Zhu, C. C.; Qikun, W.; Xin, L., Large area screen printing cathode of CNT for FED. *Diamond and Related Materials* **2003**, 12 (9), 1449-1452.
- (a) Kim, T.; Kwon, S.; Yoon, H.; Chung, C.; Kim, J., Fabrication of carbon nanotube paste using photosensitive polymer for field emission display. *Colloids and Surfaces A: Physicochem. Eng. Aspects*

- 2008**, 313-314, 448-451; (b) Bak, E. Y.; Kuninori, O.; Kim, Y. S. Composition and method for preparing electron emitter, electron emitter prepared therefrom, and flat panel display comprising the same. US 2008/0004380 A1, January 3, 2008.
6. Li, Y. Curing binder material for carbon nanotube electron emission cathodes. US2007/0262687 A1, 2007.
  7. Poss, S. M. Zinc sulfide phosphors. US 3,657,142, Apr 18, 1972.
  8. Dunham, C. M.; Lee, S.; Browning, J.; Garcia, M. Flat panel display, method of vacuum sealing. US 6,554,672 B2, April 29, 2003.
  9. Ecoinvent, ecoinvent data V 2.0. SCLCI, Ed. St-Gallen, Switzerland 2007.
  10. ERG, Compilation of major LCI data for the nanotechnology life cycle inventory project. Eastern Research Group Inc: Chantilly, VA, 2011; pp 1-67.
  11. TEC PRISM High speed mixers. [www.thermo.com.cn/Resources/200802/File\\_27349.pdf](http://www.thermo.com.cn/Resources/200802/File_27349.pdf) (accessed March 13th).
  12. EPS CE3G SHELL Lab gravity connection oven 3.4 cu. ft. 120V. <http://www.epsovens.com/Lab-Ovens/Gravity-Lab-Oven/CE3G-SHEL-LAB-OVEN/> (accessed March 13th).
  13. Heraeus High temperature furnaces. [www.vitw.cms.schunk-group.com/sixcms/.../High\\_Temp\\_Furnaces\\_E\\_0302.pdf](http://www.vitw.cms.schunk-group.com/sixcms/.../High_Temp_Furnaces_E_0302.pdf) - (accessed March 13th).
  14. CAMCO CAMCO Hydrogen/ Inert furnace. <http://camcofurnace.com/hydrogen-inert-furnaces.html> (accessed March 13th).
  15. Jaques, R. *Environmental impacts associated with new zealand cement manufacture: Branz 68*; BRANZ: Judgeford, Porirua City, 1998; pp 1-40.
  16. Firstnano first nano Easy Tube™ 3000. [http://www.firstnano.com/products/easytube3000/in\\_product3/](http://www.firstnano.com/products/easytube3000/in_product3/) (accessed March 13th).
  17. Kushnir, D.; Sanden, B. A., Energy requirements of carbon nanoparticle production. *Journal of Industrial Ecology* **2008**, 12 (3), 360-375.
  18. Schmitt, T. C.; Biris, A. S.; Miller, D. W.; Biris, A. R.; Lupu, D.; Trigwell, S.; Rahman, Z. U., Analysis of effluent gases during the CCVD growth of multiwalled carbon nanotubes from acetylene. *Carbon* **2006**, 44, 2032-2038.
  19. Plata, D. L.; Hart, A. J.; Reddy, C. M.; Gschwend, P. M., Early evaluation potential environmental impacts of carbon nanotube synthesis by chemical vapor deposition. *Environ. Sci. Technol* **2009**, 43, 8367-8373.
  20. Plata, D. L. Carbon nanotubes synthesis and detection: Limiting environmental impacts of a novel technologies. Massachusetts Institute of Technology, Boston, MA, 2009.
  21. ADC Air dispersion modeling conversions and formulas. <http://www.air-dispersion.com/formulas.html> (accessed March 15th).
  22. Hielscher Hielscher ultrasound technology: Ultrasonic processor UIP 2000hd- high efficiency. [http://www.hielscher.com/ultrasonics/i2000\\_p.htm](http://www.hielscher.com/ultrasonics/i2000_p.htm) (accessed March 15th).
  23. Rousselet Vertical decanter centrifuges. <http://www.rousselet-robotel.com/products/vert-decanter-centrifuges.php> (accessed March 15th).
  24. NREL, USLCI Database. NREL: Golden, CO, 2001.
  25. Mao, D.; Fink, R. L.; Yaniv, Z. Enhanced field emission from carbon nanotubes mixed with particles. US 7,040,948 B2, May 9 2006, 2006.
  26. EXAKT EXAKT Three roll mills. [http://www.exaktusa.com/products/three\\_roll\\_mills.html](http://www.exaktusa.com/products/three_roll_mills.html) (accessed March 16th).
  27. Marubeni LS 34-TV Screen printer [http://www.marubeni-sunnyvale.com/sp\\_ls-34tv.html](http://www.marubeni-sunnyvale.com/sp_ls-34tv.html) (accessed March 20th).
  28. Samukawa, S.; Jinnai, B.; Oda, F.; Morimoto, Y., Surface reaction enhancement by UV irradiation during Si etching process with chlorine atom beam. *Jpn. J. Appl. Phys.* **2007**, 46, L64-L66.

29. DELL IN 2020 20 Inch widescreen LCD panel monitor with high definition LED display.  
<http://www.dell.com/ae/business/p/dell-in2020/pd> (accessed Jun 27 ).
30. USEPA *Desktop computer displays: A life cycle assessment EPA 744-R-01-004a*; Environmental Protection Agency: Washington DC, USA, 2001.
